# Supplementary material for: Grape seed extract supplementation modulates hepatic lipid metabolism in rats. Implication of PPARβ/δ
Source: Royal Society of Chemistry journal article supplement (doi:10.1039/d2fo02199d), 2022-01-01
Supplement: d2fo02199d2.pdf [file d2fo02199d2.pdf]

## **Supplemental Material**

### **Serum and Tissue Measurements of Hormones, Metabolites and Reactive Oxidative Species (ROS/RNS)**

Removed blood from rats was centrifuged (2000g, 15 min) to obtain serum, which was frozen in liquid nitrogen and stored at -80°C until use. Serum hormone and metabolite levels were measured following manufacturer's protocol: glucose (Accutrend Glucose Analyser, Roche, Switzerland); insulin (Rat Insulin Elisa, Mercodia, Uppsala, Sweden); leptin (Rat Elisa Kit, BioVendor, Brno, Czech Republic); triglycerides (Triglycerides kit, QCA, Barcelona, Spain), cholesterol (Cholesterol Kit, BioSystems, Barcelona, Spain); high-density lipoprotein-cholesterol (HDL-Cholesterol Kit, BioSystems, Barcelona, Spain); non-esterified fatty acids (NEFA-HR Kit, Wako Chemicals, Neuss, Germany).

For reactive oxygen species and reactive nitrogen species (ROS/RNS) quantification, 15 mg of liver was grinded in 1 mL of 50mM phosphate buffer, pH 7.4, using a Dounce homogenizer. Homogenized samples were centrifuged at 10,000g, 4°C for 5 min and supernatants were collected and analysed fluorometrically according to the kit instructions (STA-347, Cell Biolabs, San Diego, CA, USA).

### **Western blot analysis and immunoblotting**

Primary polyclonal antibodies were: anti-PPAR $\beta/\delta$  (1:1000, ab23676), anti-p-S496-AMPK (1:1000, ab39400), anti-AMPK (1:1000, ab39644), anti-p-S9-GSK-3 $\beta$  (1:500, ab30619), anti-GSK-3 $\beta$  (1:500, ab2602), anti- $\beta$ -actin (1:1000, ab8226) from Abcam, Cambridge, UK; anti-LXR $\alpha$  (1:1000, NB400-157) from Novus Biologicals, Centennial, CO, USA); anti-SREBP-1c (1:200, sc-8984) from Santa Cruz, Dallas, TX, USA.

The secondary antibodies were goat anti-rabbit conjugated with horseradish peroxidase (1:4000, 172-1019) and goat anti-mouse conjugated with horseradish peroxidase (1:4000, 170-6516) from Bio-Rad, Spain. The immune-protein complexes formed were visualized using the ECL Western-blotting detection kit (Amersham Biosciences, Inc., Piscataway, NJ) and the images were subjected to densitometric analysis.

Samples from experimental groups were compared in the same blots and routinely checked with loading control ( $\beta$ -actin). The densitometric values of p-AMPK and p-S9-GSK-3 $\beta$  were normalized with the densitometric values of the corresponding amount of total protein mass of AMPK and S9-GSK-3 $\beta$ , respectively, in the same sample. The densitometric values of LXR $\alpha$  were normalized with the densitometric values of the red ponceau assay.

**Supplemental Table 1. Probes used for RT-PCR.**

| <b>Gene</b>                          | <b>ABI Assay ID</b> |
|--------------------------------------|---------------------|
| <i>Ppara</i>                         | Rn00566193_m1       |
| <i>Ppar<math>\beta/\delta</math></i> | Rn00565707_m1       |
| <i>Ppar<math>\gamma</math></i>       | Rn00440945_m1       |
| <i>Pdk4</i>                          | Rn00585577_m1       |
| <i>Fas</i>                           | Rn00685720_m1       |
| <i>Scd-1</i>                         | Rn00594894_g1       |
| <i>Cpt-1a</i>                        | Rn00580702_m1       |
| <i>Fat/Cd36</i>                      | Rn00580728_m1       |
| <i>Ldlr</i>                          | Rn005998442_m1      |
| <i>Pgc-1<math>\alpha</math></i>      | Rn00580241_m1       |
| <i>Acox-1</i>                        | Rn00569216_m1       |
| <i>Fgf21</i>                         | RN00590706_m1       |
| 18Sr RNA                             | 4319413E            |

**Supplemental Table 2. Primer sequences used for RT-PCR.**

| Gene                              | Forward Sequence (5' – 3') | Reverse Sequence (5' – 3') |
|-----------------------------------|----------------------------|----------------------------|
| <i>Chrebp-<math>\alpha</math></i> | AGGCTCAAGCATTCGAAGAG       | TGCATCGATCACAGGTCATT       |
| <i>Chrebp-<math>\beta</math></i>  | CTTGTCCCGGCATAGCAAC        | TCTGCAGATCGCGCGGAG         |
| 18Sr RNA                          | CGGCTACCACATCCAAGGAA       | GCTGGAATTACCGCGGCT         |

**Supplemental Table 3. Flavanol determination by degree of polymerization (HPLC-FLD-Q-ToF)**

|                              | <b>Concentration<br/>(mg/g GSE)</b> | <b>Molar %</b> | <b>Representativeness<br/>respect weigh<br/>extract (%)</b> |
|------------------------------|-------------------------------------|----------------|-------------------------------------------------------------|
| Monomers                     | 149.8 ± 0.2                         | 55.5 ± 0.2     | 15.0 ± 0.0                                                  |
| <i>Galloylated monomers</i>  | 16.0 ± 0.4                          | 3.9 ± 0.1      | 1.6 ± 0.0                                                   |
| Dimers                       | 142.0 ± 0.1                         | 26.4 ± 0.1     | 14.2 ± 0.0                                                  |
| <i>Galloylated dimers</i>    | 6.5 ± 1.8                           | 0.9 ± 0.3      | 0.6 ± 0.2                                                   |
| Trimers                      | 58.3 ± 0.3                          | 7.2 ± 0.1      | 5.8 ± 0.0                                                   |
| <i>Galloylated trimers</i>   | 1.9 ± 0.0                           | 0.2 ± 0.0      | 0.2 ± 0.0                                                   |
| Tetramers                    | 34.9 ± 0.0                          | 3.2 ± 0.0      | 3.5 ± 0.0                                                   |
| <i>Galloylated tetramers</i> | 12.6 ± 0.0                          | 1.0 ± 0.0      | 1.3 ± 0.0                                                   |
| Pentamers                    | 14.9 ± 0.2                          | 1.1 ± 0.0      | 1.5 ± 0.0                                                   |
| Hexamers                     | 5.7 ± 0.1                           | 0.4 ± 0.0      | 0.6 ± 0.0                                                   |
| Heptamers                    | 1.8 ± 0.0                           | 0.1 ± 0.0      | 0.2 ± 0.0                                                   |

Results are expressed as mean ± SD (n=3)

**Supplemental Table 4. Flavan-3-ol monomers, dimers and trimers concentration and molar percentage, as well as, the mean degree of polymerization (mDP), galloylation and prodelphinidins percentage, total polyphenolic content, and condensed tannins of GSE determined by spectrophotometric and chromatographic analysis (HPLC-ESI-Q-ToF)**

| <b>Compounds</b>                                | <b>Concentration<br/>(mg/kg GSE)</b> | <b>Molar proportions (%)</b> |
|-------------------------------------------------|--------------------------------------|------------------------------|
| <b><i>Flavan-3-ols monomers</i></b>             |                                      |                              |
| (+)-Catechin                                    | 83.2 ± 1.5                           | 53.8 ± 0.2                   |
| (-)-Epicatechin                                 | 59.5 ± 0.9                           | 38.4 ± 0.2                   |
| (+)-Galocatechin                                | 0.7 ± 0.0                            | 0.4 ± 0.0                    |
| (-)-Epigallocatechin                            | 0.4 ± 0.0                            | 0.2 ± 0.1                    |
| (+)-Catechin gallate                            | 3.9 ± 0.1                            | 1.7 ± 0.0                    |
| (-)-Epicatechin gallate                         | 12.5 ± 0.2                           | 5.3 ± 0.0                    |
| (+)-Galocatechin gallate                        | 0.1 ± 0.0                            | 0.0 ± 0.0                    |
| (-)-Epigallocatechin gallate                    | 0.2 ± 0.0                            | 0.1 ± 0.0                    |
| Total flavan-3-ols <sup>1</sup>                 | 154.7 ± 2.6                          |                              |
| <b><i>Flavan-3-ols dimers</i></b>               |                                      |                              |
| Procyanidin B1                                  | 54.4 ± 1.1                           | 25.6 ± 0.3                   |
| Procyanidin B2                                  | 39.5 ± 0.8                           | 18.7 ± 0.1                   |
| Procyanidin B3                                  | 10.8 ± 0.8                           | 5.1 ± 0.2                    |
| Procyanidin B4                                  | 14.3 ± 1.3                           | 6.7 ± 0.5                    |
| Total galloylated dimers                        | 49.3 ± 0.8                           | 18.3 ± 0.2                   |
| Total unknown dimers                            | 54.6 ± 0.7                           | 25.7 ± 0.2                   |
| Total flavan-3-ols dimers <sup>2</sup>          | 212.6 ± 2.1                          |                              |
| <b><i>Flavan-3-ols trimers</i></b>              |                                      |                              |
| Procyanidin C1                                  | 12.3 ± 0.8                           | 83.9 ± 0.9                   |
| Total unknown trimers                           | 2.4 ± 0.2                            | 16.1 ± 0.9                   |
| Total flavan-3-ols trimers <sup>3</sup>         | 14.7 ± 0.9                           |                              |
| <b><i>Proanthocyanidins</i></b>                 |                                      |                              |
| Total proanthocyanidins <sup>4</sup>            | 234.5 ± 3.1                          |                              |
| Mean degree of polymerization (mDP)             | 4.5 ± 0.2                            |                              |
| % Galloylation                                  | 7.9 ± 0.2                            |                              |
| % Prodelphinidins                               | 0.5 ± 0.0                            |                              |
| <b><i>Phenolic acids</i></b>                    |                                      |                              |
| Gallic acid                                     | 6.6 ± 0.1                            |                              |
| <b><i>Spectrophotometric determinations</i></b> |                                      |                              |
| Total polyphenol content                        | 761.8 ± 20.6                         |                              |
| Condensed tannins                               | 655.2 ± 72.6                         |                              |

<sup>1</sup>As (+)-catechin equivalents. <sup>2</sup>As procyanidin B1 equivalents. <sup>3</sup>As procyanidin C1 equivalents. <sup>4</sup>As (+)-catechin equivalents. Results are expressed as mean ± SD (n=3)

## Phenolic characterization of the chow diet

Diet formulation described by the fabricant indicate the presence of wheat middlings, ground wheat, ground corn, corn gluten meal and soybean oil as main ingredients. Thus, we proceed to analyse the phenolic composition of the diet following the method of extraction described by Bueno-Herrera & Pérez-Magariño, 2020 employed in wheat phenolic characterization.

Briefly, soluble free polyphenols were extracted three times by solid-liquid extraction from 1 g of sample, the first two with 8 mL of methanol/ 1 M HCl (85:15, v/v) and the third with 8 mL of aqueous acetone (70%), all shaken at room temperature for 30 min at 250 rpm using an orbital shaker (Thermo Scientific MaxQ400, SHKE4000-8CE, Dubuque, IA, USA). The supernatants obtained from the three fractions were pooled, centrifuged at 4000 g, 4°C for 15 min (Beckman Coulter Avanti J-26 XP, Brea, CA, USA) and filtered through 0.20 µm cellulose filters. In order to precipitate and eliminate proteins, the extracts were kept in the freezer at -20°C for approximately 48 h, after that the extracts were centrifuged and filtered in the same conditions previous described. To determine the phenolic composition by HPLC, 3 mL of extract was concentrated to 0.5 mL using a rotary evaporator at 35°C to eliminate the organic solvent and 0.5 of solvent A (CH<sub>3</sub>CN/H<sub>2</sub>O/HCOOH, 3:88.5:8.5, v/v/v) was added. Then, the extracts were filtered in 0.20 µm regenerated cellulose filters previous injection in HPLC.

After soluble free fraction preparation, the residue of the chow diet was submitted to alkaline hydrolysis to extract the insoluble bound phenolic compounds. Thus, the residue was digested with 10 mL of 2 M sodium hydroxide at room temperature for 16 h by shaking in orbital shaker at 250 rpm. After that, the solution was acidified with 2 M hydrochloric acid to pH 2.0 and extracted three times with 15 mL of ethyl acetate/ diethyl ether (1:1, v/v) by manual shaking. After each extraction, the mixture was centrifuged at 4000 g, 4°C for 15 min to separate the phases. The three organic fractions were pooled, and 20 mL of the organic phase was evaporated to dryness under vacuum at 35°C using a rotary evaporator. The residue was dissolved in 1.5 mL of solvent A (CH<sub>3</sub>CN/H<sub>2</sub>O/HCOOH, 3:88.5:8.5, v/v/v) and filtered through 0.20 µm cellulose filters previous analysis by HPLC.

Chromatographic identification and quantification of polyphenols presented in both fractions were analysed with an Agilent 1100 Series system (Agilent, Waldbronn, Germany) equipped with a DAD (G1315B) and LC/MSD Trap VL (G2445C VL) ESI-MS/MS system following the chromatographic conditions reported by Pérez-Navarro et al., 2019. The chromatographic separation was carried out on a reversed-phased column ZORBAX Eclipse XDB-C18 (2.1 x 150 mm, 3.5 µm particle, Agilent USA, Santa Clara, CA, USA), thermostated at 40°C with a flow rate of 0.19 mL/min. The composition of the mobile phases was: CH<sub>3</sub>CN/H<sub>2</sub>O/HCOOH (3:88.5:8.5, v/v/v, solvent A), CH<sub>3</sub>CN/H<sub>2</sub>O/HCOOH (50:41.5:8.5, v/v/v, solvent B) and CH<sub>3</sub>OH/H<sub>2</sub>O/HCOOH (90:1.5:8.5, v/v/v, solvent C). The gradient was (time, % solvents B and C): zero min, 4% B; 8 min, 4% B; 37 min, 17% B and 13% C; 51 min, 30% B and 20% C; 51.5 min, 40% B and 30% C; 56 min, 50% B and 50% C; 57 min, 50% B and 50% C; and 64 min, 4% B. Mass spectrometry data were acquired in negative ionization mode with the following parameters: scan range, 100-1000 m/z; dry gas, N<sub>2</sub>, 8 L/min; nebulizer, 40 psi; capillary,

3500 V; drying temperature, 350°C ; skimmer 1, -20 V; skimmer 2, -60 V. The injection volume was 20 µL for the soluble free fraction and 5µL for the insoluble bound phenolic extracts. Polyphenol identification was according to UV-Vis and MS/MS spectra obtained from commercial standards of caffeic acid, *p*-coumaric acid and apigenin from Sigma-Aldrich (Tres Cantos, Madrid, Spain), ferulic acid from Fluka (Sigma-Aldrich, Milan, Italy) and daidzin and genistin from MedChemExpress (Monmouth Junction, NJ, USA) whereas the rest of polyphenols were tentatively identified with data reported in the literature. Quantification was performed using DAD-chromatograms extracted at 320 nm for hydroxycinnamic acids and flavone derivatives and 280 nm for isoflavones, using calibration curves of different commercial standards depending on the compound (see **supplemental Table 5**).

The results of the spectrophotometric determination of the total phenolic content showed a concentration of  $2385 \pm 220$  µg gallic acid equivalents/g of diet of soluble free phenolics and  $3159 \pm 504$  µg gallic acid equivalents/g of diet of insoluble bound phenolic.

The chromatographic characterization of the diet reveals the presence of hydroxycinnamic acids, isoflavones and apigenin derivatives, as shows the **supplementary Table 5**. Particularly, ferulic acid and dehydrodiferulic acids presented in the insoluble bound fraction were the most relevant polyphenols found in diet, being the ferulic acid the principal polyphenol quantified in chow diet ( $1691 \pm 301$  µg/g). Other hydroxycinnamic acids were quantified in the soluble free fraction, such as caffeic acid and *p*-coumaric acid, as well as concentrations of isoflavones and apigenin derivatives. The presence of these polyphenols may explain the presence of phenolic metabolites in control rat serum samples used in this study, however the contribution of chow diet polyphenols to the pool of polyphenols provided to the animals did not avoid the differentiation between groups of treatment.

## References:

- Bueno-Herrera, M., & Pérez-Magariño, S. (2020). Validation of an extraction method for the quantification of soluble free and insoluble bound phenolic compounds in wheat by HPLC-DAD. *Journal of Cereal Science*, 93(December 2019). <https://doi.org/10.1016/j.jcs.2020.102984>
- Pérez-Navarro, J., Izquierdo-Cañas, P. M., Mena-Morales, A., Martínez-Gascueña, J., Chacón-Vozmediano, J. L., García-Romero, E., ... Gómez-Alonso, S. (2019). Phenolic compounds profile of different berry parts from novel *Vitis vinifera* L. red grape genotypes and Tempranillo using HPLC-DAD-ESI-MS/MS: A varietal differentiation tool. *Food Chemistry*, 295(January), 350–360. <https://doi.org/10.1016/j.foodchem.2019.05.137>

**Supplemental Table 5. Phenolic composition of chow rat diet determined by spectrophotometric and chromatographic analysis (HPLC-MS-DAD)**

| Phenolic compounds         | Soluble free fraction concentration (µg/g diet) | Insoluble bound fraction concentration (µg/g diet) | Quantification on wavelength (nm) | Calibration compound    |
|----------------------------|-------------------------------------------------|----------------------------------------------------|-----------------------------------|-------------------------|
| Caffeic acid               | 1.3 ± 0.1                                       | N.D.                                               | 320                               | Caffeic acid            |
| <i>p</i> -coumaric acid    | N.D.                                            | 73.0 ± 7.5                                         | 320                               | <i>p</i> -coumaric acid |
| Ferulic acid               | N.D.                                            | 1691 ± 301                                         | 320                               | Ferulic acid            |
| Daidzin                    | 10.5 ± 1.0                                      | N.D.                                               | 280                               | Daidzin                 |
| Api-6-C-ara-8-C-hex        | 12.1 ± 1.0                                      | N.D.                                               | 320                               | Apigenin                |
| Api-6-C-ara-8-C-hex        | 17.4 ± 0.7                                      | N.D.                                               | 320                               | Apigenin                |
| DFA                        | ND                                              | 12.7 ± 2.1                                         | 320                               | Ferulic acid            |
| Api-6-C-ara-8-C-hex        | 4.0 ± 0.2                                       | N.D.                                               | 320                               | Apigenin                |
| Api-6-C-ara-8-C-hex        | 79.8 ± 6.1                                      | N.D.                                               | 320                               | Apigenin                |
| Genistin                   | 15.6 ± 0.9                                      | N.D.                                               | 280                               | Genistin                |
| DFA                        | ND                                              | 50.4 ± 4.2                                         | 320                               | Ferulic acid            |
| Api-6-C-β-gal-8-C-β-gluc   | 12.2 ± 0.9                                      | N.D.                                               | 320                               | Apigenin                |
| Api-6-C-β-gal-8-C-β-gluc   | 46.7 ± 10.0                                     | N.D.                                               | 320                               | Apigenin                |
| Daidzein                   | 8.7 ± 0.4                                       | N.D.                                               | 280                               | Daidzine                |
| Dicoumaroyl spermidine     | 17.3 ± 1.4                                      | N.D.                                               | 320                               | <i>p</i> -coumaric acid |
| Genistein                  | 9.3 ± 0.5                                       | N.D.                                               | 280                               | Genistin                |
| DFA                        | N.D.                                            | 68.2 ± 4.8                                         | 320                               | Ferulic acid            |
| DFA                        | N.D.                                            | 76.6 ± 6.6                                         | 320                               | Ferulic acid            |
| DFA                        | N.D.                                            | 45.3 ± 7.6                                         | 320                               | Ferulic acid            |
| Σ Api-6-C-ara-8-C-hex      | 112.0 ± 6.0                                     | N.D.                                               |                                   |                         |
| Σ Api-6-C-β-gal-8-C-β-gluc | 58.9 ± 12.9                                     | N.D.                                               |                                   |                         |
| Σ DFA                      | N.D.                                            | 251.6 ± 17.3                                       |                                   |                         |
| Σ Isoflavones              | 44.1 ± 1.1                                      | N.D.                                               |                                   |                         |
| Total phenols              | 211.6 ± 9.7                                     | 2016 ± 303                                         |                                   |                         |

Results are expressed as mean ± standard deviation (n=3). DFA: dehydrodiferulic acid; Api-6-C-ara-8-C-hex: Apigenin-6-C-arabinose-8-C-hexoside; Api-6-C-β-gal-8-C-β-gluc: Apigenin-6-C-β-galactosyl-8-C-glucosyl-O-glucopyranoside.
