# Supplementary figures and images for: Grape seed extract supplementation modulates hepatic lipid metabolism in rats. Implication of PPARβ/δ
Source: Royal Society of Chemistry journal article supplement (doi:10.1039/d2fo02199d), 2022-01-01

## ORIGINAL WESTERN BLOTS

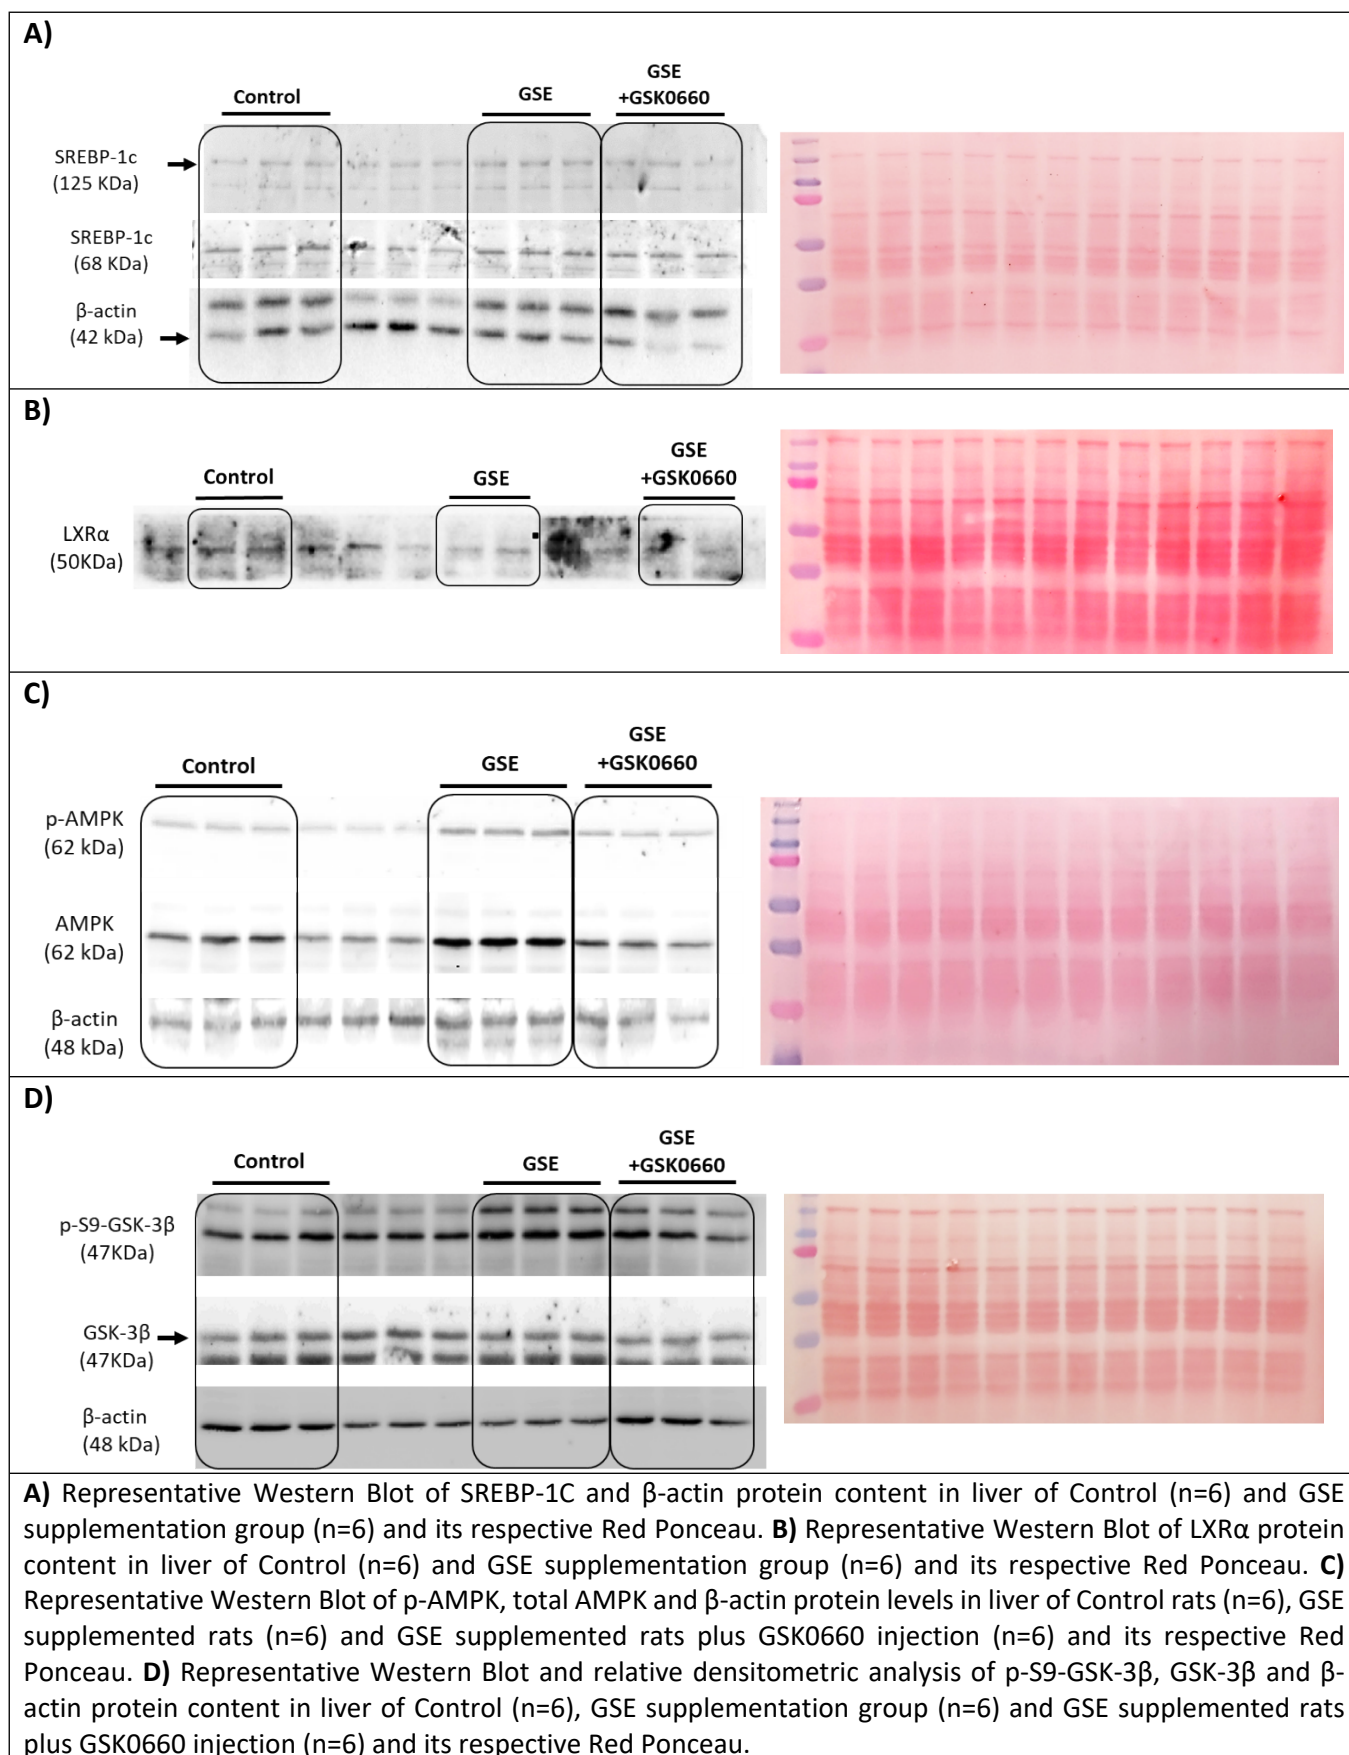

Supplement: d2fo02199d1.pdf [file d2fo02199d1.pdf]
